# Supplementary material
Source: PubMed Central journal article supplement (PMC4793593)
Supplement: bafa015365.ww1_default.pdf [file bafa015365.ww1_default.pdf]

**Appendix table A** presentation of results in 121 reports of network meta-analysis according to funding source. Values are numbers (percentages)

| Items—yes if reported                                                                                    | Funding sources |                 |                       |
|----------------------------------------------------------------------------------------------------------|-----------------|-----------------|-----------------------|
|                                                                                                          | Public<br>n=55  | Private<br>n=48 | Not reported,<br>n=18 |
| <b>Amount of evidence in network of randomised trials</b>                                                |                 |                 |                       |
| Interventions included in network                                                                        | 55 (100)        | 48 (100)        | 18 (100)              |
| Direct comparisons between interventions                                                                 | 41 (75)         | 27 (56)         | 14 (78)               |
| No of trials for each comparison                                                                         | 33 (60)         | 25 (52)         | 11 (61)               |
| No of patients for each comparison                                                                       | 15 (27)         | 6 (13)          | 4 (22)                |
| Network graph*                                                                                           | 45 (82)         | 30 (63)         | 14 (78)               |
| <b>Effect size estimates for pair-wise comparisons between interventions</b>                             |                 |                 |                       |
| Results of all individual trials used in network meta-analysis                                           | 31 (56)         | 26 (54)         | 11 (61)               |
| Direct evidence                                                                                          | 38 (69)         | 23 (48)         | 12 (67)               |
| Indirect evidence                                                                                        | 6 (11)          | 5 (10)          | 2 (11)                |
| Mixed evidence                                                                                           | 41 (75)         | 23 (48)         | 14 (78)               |
| Effect estimates for some selected pairwise comparisons between interventions from network meta-analysis | 14 (25)         | 25 (52)         | 4 (22)                |
| Format of results†                                                                                       |                 |                 |                       |
| Table                                                                                                    | 30 (55)         | 33 (69)         | 15 (83)               |
| Forest plot                                                                                              | 18 (33)         | 20 (42)         | 3 (17)                |
| Matrix                                                                                                   | 6 (11)          | 0 (0)           | 1 (6)                 |
| Figure                                                                                                   | 3 (5)           | 2 (4)           | 1 (6)                 |
| Text                                                                                                     | 3 (5)           | 1 (2)           | 0 (0)                 |
| <b>Rank order of interventions</b>                                                                       |                 |                 |                       |
| Rank order of interventions‡                                                                             | 28/41 (68)      | 16/36 (44)      | 8/14 (57)             |
| Rank order of interventions with uncertainty                                                             | 5/28 (18)       | 2/16 (13)       | 2/8 (25)              |

†Multiple answers were possible, so the total does not equal 100%

\* 7 star networks and 4 fully connected networks reported no network graph, but the authors explicitly mentioned the interventions and direct comparisons in the network.

‡NMs that did not use a Bayesian approach cannot derive intervention rankings; 91 NMs used a Bayesian approach

## List of references to selected reports of network meta-analysis

1. Psaty BM, Lumley T, Furberg CD, Schellenbaum G, Pahor M, Alderman MH, et al. Health outcomes associated with various antihypertensive therapies used as first-line agents: a network meta-analysis. *JAMA* 2003;289(19):2534-44.
2. Cooper NJ, Sutton AJ, Lu G, Khunti K. Mixed comparison of stroke prevention treatments in individuals with nonrheumatic atrial fibrillation. *Arch Intern Med* 2006;166(12):1269-75.
3. Jansen JP. Self-monitoring of glucose in type 2 diabetes mellitus: a Bayesian meta-analysis of direct and indirect comparisons. *Curr Med Res Opin* 2006;22(4):671-81.
4. Kyrgiou M, Salanti G, Pavlidis N, Paraskevidis E, Ioannidis JP. Survival benefits with diverse chemotherapy regimens for ovarian cancer: meta-analysis of multiple treatments. *J Natl Cancer Inst* 2006;98(22):1655-63.
5. Elliott WJ, Meyer PM. Incident diabetes in clinical trials of antihypertensive drugs: a network meta-analysis. *Lancet* 2007;369(9557):201-7.
6. Golfinopoulos V, Salanti G, Pavlidis N, Ioannidis JP. Survival and disease-progression benefits with treatment regimens for advanced colorectal cancer: a meta-analysis. *Lancet Oncol* 2007;8(10):898-911.
7. Lam SK, Owen A. Combined resynchronisation and implantable defibrillator therapy in left ventricular dysfunction: Bayesian network meta-analysis of randomised controlled trials. *BMJ* 2007;335(7626):925.
8. Nixon R, Bansback N, Brennan A. The efficacy of inhibiting tumour necrosis factor alpha and interleukin 1 in patients with rheumatoid arthritis: a meta-analysis and adjusted indirect comparisons. *Rheumatology (Oxford)* 2007;46(7):1140-7.
9. Tudur Smith C, Marson AG, Chadwick DW, Williamson PR. Multiple treatment comparisons in epilepsy monotherapy trials. *Trials* 2007;8:34.
10. Stettler C, Wandel S, Allemann S, Kastrati A, Morice MC, Schomig A, et al. Outcomes associated with drug-eluting and bare-metal stents: a collaborative network meta-analysis. *Lancet* 2007;370(9591):937-48.
11. Coleman CI, Baker WL, Kluger J, White CM. Antihypertensive medication and their impact on cancer incidence: a mixed treatment comparison meta-analysis of randomized controlled trials. *J Hypertens* 2008;26(4):622-9.
12. Hansen RA, Gaynes BN, Gartlehner G, Moore CG, Tiwari R, Lohr KN. Efficacy and tolerability of second-generation antidepressants in social anxiety disorder. *Int Clin Psychopharmacol* 2008;23(3):170-9.
13. Mauri D, Polyzos NP, Salanti G, Pavlidis N, Ioannidis JP. Multiple-treatments meta-analysis of chemotherapy and targeted therapies in advanced breast cancer. *J Natl Cancer Inst* 2008;100(24):1780-91.
14. Mills EJ, Rachlis B, Wu P, Devereaux PJ, Arora P, Perri D. Primary prevention of cardiovascular mortality and events with statin treatments: a network meta-analysis involving more than 65,000 patients. *J Am Coll Cardiol* 2008;52(22):1769-81.
15. Stettler C, Allemann S, Wandel S, Kastrati A, Morice MC, Schomig A, et al. Drug eluting and bare metal stents in people with and without diabetes: collaborative network meta-analysis. *BMJ* 2008;337:a1331.
16. Thijs V, Lemmens R, Fieuws S. Network meta-analysis: simultaneous meta-analysis of common antiplatelet regimens after transient ischaemic attack or stroke. *Eur Heart J* 2008;29(9):1086-92.

17. Bansback N, Sizto S, Sun H, Feldman S, Willian MK, Anis A. Efficacy of systemic treatments for moderate to severe plaque psoriasis: systematic review and meta-analysis. *Dermatology* 2009;219(3):209-18.
18. Baker WL, Baker EL, Coleman CI. Pharmacologic treatments for chronic obstructive pulmonary disease: a mixed-treatment comparison meta-analysis. *Pharmacotherapy* 2009;29(8):891-905.
19. Cipriani A, Furukawa TA, Salanti G, Geddes JR, Higgins JP, Churchill R, et al. Comparative efficacy and acceptability of 12 new-generation antidepressants: a multiple-treatments meta-analysis. *Lancet* 2009;373(9665):746-58.
20. Edwards SJ, Lind T, Lundell L, Das R. Systematic review: standard- and double-dose proton pump inhibitors for the healing of severe erosive oesophagitis -- a mixed treatment comparison of randomized controlled trials. *Aliment Pharmacol Ther* 2009;30(6):547-56.
21. Edwards SJ, Smith CJ. Tolerability of atypical antipsychotics in the treatment of adults with schizophrenia or bipolar disorder: a mixed treatment comparison of randomized controlled trials. *Clin Ther* 2009;31 Pt 1:1345-59.
22. Edwards SJ, Clarke MJ, Wordsworth S, Welton NJ. Carbapenems versus other beta-lactams in the treatment of hospitalised patients with infection: a mixed treatment comparison. *Curr Med Res Opin* 2009;25(1):251-61.
23. Golfopoulou V, Pentheroudakis G, Salanti G, Nearchou AD, Ioannidis JP, Pavlidis N. Comparative survival with diverse chemotherapy regimens for cancer of unknown primary site: multiple-treatments meta-analysis. *Cancer Treat Rev* 2009;35(7):570-3.
24. Hawkins N, Scott DA, Woods BS, Thatcher N. No study left behind: a network meta-analysis in non-small-cell lung cancer demonstrating the importance of considering all relevant data. *Value Health* 2009;12(6):996-1003.
25. Jansen JP, Bergman GJ, Huels J, Olson M. Prevention of vertebral fractures in osteoporosis: mixed treatment comparison of bisphosphonate therapies. *Curr Med Res Opin* 2009;25(8):1861-8.
26. Manzoli L, Salanti G, De Vito C, Boccia A, Ioannidis JP, Villari P. Immunogenicity and adverse events of avian influenza A H5N1 vaccine in healthy adults: multiple-treatments meta-analysis. *Lancet Infect Dis* 2009;9(8):482-92.
27. Mills EJ, Perri D, Cooper C, Nachega JB, Wu P, Tleyjeh I, et al. Antifungal treatment for invasive *Candida* infections: a mixed treatment comparison meta-analysis. *Ann Clin Microbiol Antimicrob* 2009;8:23.
28. Puhan MA, Bachmann LM, Kleijnen J, Ter Riet G, Kessels AG. Inhaled drugs to reduce exacerbations in patients with chronic obstructive pulmonary disease: a network meta-analysis. *BMC Med* 2009;7:2.
29. Quilici S, Chancellor J, Lothgren M, Simon D, Said G, Le TK, et al. Meta-analysis of duloxetine vs. pregabalin and gabapentin in the treatment of diabetic peripheral neuropathic pain. *BMC Neurol* 2009;9:6.
30. Singh JA, Christensen R, Wells GA, Suarez-Almazor ME, Buchbinder R, Lopez-Olivo MA, et al. A network meta-analysis of randomized controlled trials of biologics for rheumatoid arthritis: a Cochrane overview. *CMAJ* 2009;181(11):787-96.
31. Strassmann R, Bausch B, Spaar A, Kleijnen J, Braendli O, Puhan MA. Smoking cessation interventions in COPD: a network meta-analysis of randomised trials. *Eur Respir J* 2009;34(3):634-40.
32. Trikalinos TA, Alsheikh-Ali AA, Tatsioni A, Nallamothu BK, Kent DM. Percutaneous coronary interventions for non-acute coronary artery disease: a quantitative 20-year synopsis and a network meta-analysis. *Lancet* 2009;373(9667):911-8.

33. van der Valk R, Webers CA, Lumley T, Hendrikse F, Prins MH, Schouten JS. A network meta-analysis combined direct and indirect comparisons between glaucoma drugs to rank effectiveness in lowering intraocular pressure. *J Clin Epidemiol* 2009;62(12):1279-83.
34. Welton NJ, Caldwell DM, Adamopoulos E, Vedhara K. Mixed treatment comparison meta-analysis of complex interventions: psychological interventions in coronary heart disease. *Am J Epidemiol* 2009;169(9):1158-65.
35. Bangalore S, Kumar S, Kjeldsen SE, Makani H, Grossman E, Wetterslev J, et al. Antihypertensive drugs and risk of cancer: network meta-analyses and trial sequential analyses of 324,168 participants from randomised trials. *Lancet Oncol*;12(1):65-82.
36. Bergman GJ, Hochberg MC, Boers M, Wintfeld N, Kielhorn A, Jansen JP. Indirect comparison of tocilizumab and other biologic agents in patients with rheumatoid arthritis and inadequate response to disease-modifying antirheumatic drugs. *Semin Arthritis Rheum*;39(6):425-41.
37. Dakin H, Fidler C, Harper C. Mixed treatment comparison meta-analysis evaluating the relative efficacy of nucleos(t)ides for treatment of nucleos(t)ide-naïve patients with chronic hepatitis B. *Value Health*;13(8):934-45.
38. Jansen JP, Bergman GJ, Huels J, Olson M. The efficacy of bisphosphonates in the prevention of vertebral, hip, and nonvertebral-nonhip fractures in osteoporosis: a network meta-analysis. *Semin Arthritis Rheum*;40(4):275-84 e1-2.
39. Jones LJ, Craven PD, Attia J, Thakkinstian A, Wright I. Network meta-analysis of indomethacin versus ibuprofen versus placebo for PDA in preterm infants. *Arch Dis Child Fetal Neonatal Ed*;96(1):F45-52.
40. Meader N. A comparison of methadone, buprenorphine and alpha(2) adrenergic agonists for opioid detoxification: a mixed treatment comparison meta-analysis. *Drug Alcohol Depend*;108(1-2):110-4.
41. Mills EJ, Wu P, Chong G, Ghement I, Singh S, Akl EA, et al. Efficacy and safety of statin treatment for cardiovascular disease: a network meta-analysis of 170,255 patients from 76 randomized trials. *QJM*;104(2):109-24.
42. Orme M, Collins S, Dakin H, Kelly S, Loftus J. Mixed treatment comparison and meta-regression of the efficacy and safety of prostaglandin analogues and comparators for primary open-angle glaucoma and ocular hypertension. *Curr Med Res Opin*;26(3):511-28.
43. Owen A. Antithrombotic treatment for the primary prevention of stroke in patients with non valvular atrial fibrillation: a reappraisal of the evidence and network meta analysis. *Int J Cardiol*;142(3):218-23.
44. Phung OJ, Scholle JM, Talwar M, Coleman CI. Effect of noninsulin antidiabetic drugs added to metformin therapy on glycemic control, weight gain, and hypoglycemia in type 2 diabetes. *JAMA*;303(14):1410-8.
45. Riemsma R, Forbes CA, Kessels A, Lykopoulos K, Amonkar MM, Rea DW, et al. Systematic review of aromatase inhibitors in the first-line treatment for hormone sensitive advanced or metastatic breast cancer. *Breast Cancer Res Treat*;123(1):9-24.
46. Roskell NS, Beard SM, Zhao Y, Le TK. A Meta-Analysis of Pain Response in the Treatment of Fibromyalgia. *Pain Pract*.
47. Tropeano AI, Saleh N, Hawajri N, Macquin-Mavier I, Maison P. Do all antihypertensive drugs improve carotid intima-media thickness? A network meta-analysis of randomized controlled trials. *Fundam Clin Pharmacol*;25(3):395-404.
48. Tu YK, Woolston A, Faggion CM, Jr. Do bone grafts or barrier membranes provide additional treatment effects for infrabony lesions treated with enamel matrix

- derivatives? A network meta-analysis of randomized-controlled trials. *J Clin Periodontol*;37(1):59-79.
49. Uthman OA, Abdulmalik J. Comparative efficacy and acceptability of pharmacotherapeutic agents for anxiety disorders in children and adolescents: a mixed treatment comparison meta-analysis. *Curr Med Res Opin*;26(1):53-9.
  50. Van den Bruel A, Gailly J, Devriese S, Welton NJ, Shortt AJ, Vrijens F. The protective effect of ophthalmic viscoelastic devices on endothelial cell loss during cataract surgery: a meta-analysis using mixed treatment comparisons. *Br J Ophthalmol*;95(1):5-10.
  51. Vissers D, Stam W, Nolte T, Lenre M, Jansen J. Efficacy of intranasal fentanyl spray versus other opioids for breakthrough pain in cancer. *Curr Med Res Opin*;26(5):1037-45.
  52. Walsh T, Worthington HV, Glenny AM, Appelbe P, Marinho VC, Shi X. Fluoride toothpastes of different concentrations for preventing dental caries in children and adolescents. *Cochrane Database Syst Rev* (1):CD007868.
  53. Wandel S, Juni P, Tendal B, Nuesch E, Villiger PM, Welton NJ, et al. Effects of glucosamine, chondroitin, or placebo in patients with osteoarthritis of hip or knee: network meta-analysis. *BMJ*;341:c4675.
  54. Wang H, Huang T, Jing J, Jin J, Wang P, Yang M, et al. Effectiveness of different central venous catheters for catheter-related infections: a network meta-analysis. *J Hosp Infect*;76(1):1-11.
  55. Wilhelmus KR. Antiviral treatment and other therapeutic interventions for herpes simplex virus epithelial keratitis. *Cochrane Database Syst Rev* 2010(12):CD002898.
  56. Wolff RF, Bala MM, Westwood M, Kessels AG, Kleijnen J. 5% lidocaine-medicated plaster vs other relevant interventions and placebo for post-herpetic neuralgia (PHN): a systematic review. *Acta Neurol Scand*.
  57. Wolff RF, Bala MM, Westwood M, Kessels AG, Kleijnen J. 5% lidocaine medicated plaster in painful diabetic peripheral neuropathy (DPN): a systematic review. *Swiss Med Wkly*;140(21-22):297-306.
  58. Woo G, Tomlinson G, Nishikawa Y, Kowgier M, Sherman M, Wong DK, et al. Tenofovir and entecavir are the most effective antiviral agents for chronic hepatitis B: a systematic review and Bayesian meta-analyses. *Gastroenterology*;139(4):1218-29.
  59. Anothaisintawee T, Attia J, Nickel JC, Thammakraisorn S, Numthavaj P, McEvoy M, et al. Management of chronic prostatitis/chronic pelvic pain syndrome: a systematic review and network meta-analysis. *JAMA*;305(1):78-86.
  60. Baldwin D, Woods R, Lawson R, Taylor D. Efficacy of drug treatments for generalised anxiety disorder: systematic review and meta-analysis. *BMJ*;342:d1199.
  61. Bekkering GE, Soares-Weiser K, Reid K, Kessels AG, Dahan A, Treede RD, et al. Can morphine still be considered to be the standard for treating chronic pain? A systematic review including pair-wise and network meta-analyses. *Curr Med Res Opin* 2011;27(7):1477-91.
  62. Choy E, Marshall D, Gabriel ZL, Mitchell SA, Gylee E, Dakin HA. A Systematic Review and Mixed Treatment Comparison of the Efficacy of Pharmacological Treatments for Fibromyalgia. *Seminars in Arthritis and Rheumatism* 2011;41(3):335-45.e6.
  63. Cipriani A, Barbui C, Salanti G, Rendell J, Brown R, Stockton S, et al. Comparative efficacy and acceptability of antimanic drugs in acute mania: a multiple-treatments meta-analysis. *Lancet* 2011;378(9799):1306-15.
  64. Cope S, Capkun-Niggli G, Gale R, Jardim JR, Jansen JP. Comparative efficacy of indacaterol 150 mug and 300 mug versus fixed-dose combinations of formoterol + budesonide or salmeterol + fluticasone for the treatment of chronic obstructive

- pulmonary disease--a network meta-analysis. *Int J Chron Obstruct Pulmon Dis* 2011;6:329-44.
65. Danchin N, Marzilli M, Parkhomenko A, Ribeiro JP. Efficacy comparison of trimetazidine with therapeutic alternatives in stable angina pectoris: a network meta-analysis. *Cardiology* 2011;120(2):59-72.
  66. Freemantle N, Lafuente-Lafuente C, Mitchell S, Eckert L, Reynolds M. Mixed treatment comparison of dronedarone, amiodarone, sotalol, flecainide, and propafenone, for the management of atrial fibrillation. *Europace*;13(3):329-45.
  67. Freemantle N, Tharmanathan P, Herbrecht R. Systematic review and mixed treatment comparison of randomized evidence for empirical, pre-emptive and directed treatment strategies for invasive mould disease. *J Antimicrob Chemother*;66 Suppl 1:i25-35.
  68. Gartlehner G, Hansen RA, Morgan LC, Thaler K, Lux L, Van Noord M, et al. Comparative benefits and harms of second-generation antidepressants for treating major depressive disorder: an updated meta-analysis. *Ann Intern Med* 2011;155(11):772-85.
  69. Gross JL, Kramer CK, Leitao CB, Hawkins N, Viana LV, Schaan BD, et al. Effect of Antihyperglycemic Agents Added to Metformin and a Sulfonylurea on Glycemic Control and Weight Gain in Type 2 Diabetes: A Network Meta-analysis. *Ann Intern Med*;154(10):672-79.
  70. Guyot P, Taylor P, Christensen R, Pericleous L, Poncet C, Lebmeier M, et al. Abatacept with methotrexate versus other biologic agents in treatment of patients with active rheumatoid arthritis despite methotrexate: a network meta-analysis (Provisional abstract). *Arthritis Research and Therapy*, 2011:R204.
  71. Hartling L, Fernandes RM, Bialy L, Milne A, Johnson D, Plint A, et al. Steroids and bronchodilators for acute bronchiolitis in the first two years of life: systematic review and meta-analysis. *BMJ*;342:d1714.
  72. Ibrahim T, Qureshi A, Sutton AJ, Dias JJ. Surgical versus nonsurgical treatment of acute minimally displaced and undisplaced scaphoid waist fractures: pairwise and network meta-analyses of randomized controlled trials. *J Hand Surg Am* 2011;36(11):1759-68 e1.
  73. Jalota L, Kalira V, George E, Shi YY, Hornuss C, Radke O, et al. Prevention of pain on injection of propofol: systematic review and meta-analysis. *BMJ* 2011;342:d1110.
  74. Launois R, Avouac B, Berenbaum F, Blin O, Bru I, Fautrel B, et al. Comparison of Certolizumab Pegol with Other Anticytokine Agents for Treatment of Rheumatoid Arthritis: A Multiple-treatment Bayesian Metaanalysis. *J Rheumatol*;38(5):835-45.
  75. Manzoli L, De Vito C, Salanti G, D'Addario M, Villari P, Ioannidis JP. Meta-analysis of the immunogenicity and tolerability of pandemic influenza A 2009 (H1N1) vaccines. *PLoS One* 2011;6(9):e24384.
  76. Maund E, McDaid C, Rice S, Wright K, Jenkins B, Woolacott N. Paracetamol and selective and non-selective non-steroidal anti-inflammatory drugs for the reduction in morphine-related side-effects after major surgery: a systematic review. *Br J Anaesth*;106(3):292-7.
  77. McIntosh B, Cameron C, Singh SR, Yu C, Ahuja T, Welton NJ, et al. Second-line therapy in patients with type 2 diabetes inadequately controlled with metformin monotherapy: a systematic review and mixed-treatment comparison meta-analysis. *Open Med* 2011;5(1):e35-48.
  78. Mills EJ, Druyts E, Ghement I, Puhan MA. Pharmacotherapies for chronic obstructive pulmonary disease: a multiple treatment comparison meta-analysis. *Clin Epidemiol*;3:107-29.

79. Numthavaj P, Thakkinstian A, Dejthevaporn C, Attia J. Corticosteroid and antiviral therapy for Bell's palsy: a network meta-analysis. *BMC Neurol*;11:1.
80. Padwal R, Klarenbach S, Wiebe N, Birch D, Karmali S, Manns B, et al. Bariatric surgery: a systematic review and network meta-analysis of randomized trials. *Obes Rev* 2011;12(8):602-21.
81. Phung OJ, Sood NA, Sill BE, Coleman CI. Oral anti-diabetic drugs for the prevention of Type 2 diabetes. *Diabet Med* 2011;28(8):948-64.
82. Phung OJ, Kahn SR, Cook DJ, Murad MH. Dosing frequency of unfractionated heparin thromboprophylaxis: a meta-analysis. *Chest* 2011;140(2):374-81.
83. Ribeiro RA, Ziegelmann PK, Duncan BB, Stella SF, da Costa Vieira JL, Restelatto LMF, et al. Impact of statin dose on major cardiovascular events: A mixed treatment comparison meta-analysis involving more than 175,000 patients. *International Journal of Cardiology* 2011.
84. Roskell NS, Lip GY, Noack H, Clemens A, Plumb JM. Treatments for stroke prevention in atrial fibrillation: a network meta-analysis and indirect comparisons versus dabigatran etexilate. *Thromb Haemost*;104(6):1106-15.
85. Sanches ACC, Correr CJ, Venson R, Pontarolo R. Revisiting the efficacy of long-acting insulin analogues on adults with type 1 diabetes using mixed-treatment comparisons. *Diabetes Research and Clinical Practice* 2011;94(3):333-39.
86. Sciarretta S, Palano F, Tocci G, Baldini R, Volpe M. Antihypertensive treatment and development of heart failure in hypertension: a Bayesian network meta-analysis of studies in patients with hypertension and high cardiovascular risk. *Arch Intern Med* 2011;171(5):384-94.
87. Trelle S, Reichenbach S, Wandel S, Hildebrand P, Tschannen B, Villiger PM, et al. Cardiovascular safety of non-steroidal anti-inflammatory drugs: network meta-analysis. *BMJ*;342:c7086.
88. Turkstra E, Ng SK, Scuffham PA. A mixed treatment comparison of the short-term efficacy of biologic disease modifying anti-rheumatic drugs in established rheumatoid arthritis. *Curr Med Res Opin* 2011;27(10):1885-97.
89. van de Kerkhof P, de Peuter R, Rytto J, Jansen JP. Mixed treatment comparison of a two-compound formulation (TCF) product containing calcipotriol and betamethasone dipropionate with other topical treatments in psoriasis vulgaris. *Curr Med Res Opin*;27(1):225-38.
90. Vieira MC, Kumar RN, Jansen JP. Comparative effectiveness of efavirenz, protease inhibitors, and raltegravir-based regimens as first-line treatment for HIV-infected adults: a mixed treatment comparison. *HIV Clin Trials* 2011;12(4):175-89.
91. Virgili G, Novielli N, Menchini F, Murro V, Giacomelli G. Pharmacological treatments for neovascular age-related macular degeneration: can mixed treatment comparison meta-analysis be useful? *Curr Drug Targets*;12(2):212-20.
92. Wiebe N, Padwal R, Field C, Marks S, Jacobs R, Tonelli M. A systematic review on the effect of sweeteners on glycemic response and clinically relevant outcomes. *BMC Med* 2011;9:123.
93. Ziogas DC, Voulgarelis M, Zintzaras E. A Network Meta-analysis of Randomized Controlled Trials of Induction Treatments in Acute Myeloid Leukemia in the Elderly. *Clin Ther*;33(3):254-79.
94. Bangalore S, Kumar S, Fusaro M, Amoroso N, Attubato MJ, Feit F, et al. Short-and long-term outcomes with drug-eluting and bare-metal coronary stents: A mixed-treatment comparison analysis of 117 762 patient-years of follow-up from randomized trials. *Circulation* 2012;125(23):2873-91.

95. Bash LD, Buono JL, Davies GM, Martin A, Fahrbach K, Phatak H, et al. Systematic review and meta-analysis of the efficacy of cardioversion by vernakalant and comparators in patients with atrial fibrillation. *Cardiovascular Drugs and Therapy* 2012;26(2):167-79.
96. Chang KV, Chen SY, Chen WS, Tu YK, Chien KL. Comparative effectiveness of focused shock wave therapy of different intensity levels and radial shock wave therapy for treating plantar fasciitis: A systematic review and network meta-analysis. *Archives of Physical Medicine and Rehabilitation* 2012;93(7):1259-68.
97. Cheng MM, Goulart B, Veenstra DL, Blough DK, Devine EB. A network meta-analysis of therapies for previously untreated chronic lymphocytic leukemia. *Cancer Treatment Reviews* 2012.
98. Daniels JP, Middleton LJ, Champaneria R, Khan KS, Cooper K, Mol BW, et al. Second generation endometrial ablation techniques for heavy menstrual bleeding: network meta-analysis. *BMJ* 2012;344:e2564.
99. Del Santo F, Maratea D, Fadda V, Trippoli S, Messori A. Treatments for relapsing-remitting multiple sclerosis: summarising current information by network meta-analysis. *Eur J Clin Pharmacol* 2012;68(4):441-8.
100. Dumville JC, Soares MO, O'Meara S, Cullum N. Systematic review and mixed treatment comparison: dressings to heal diabetic foot ulcers. *Diabetologia* 2012:1-9.
101. Dunkley AJ, Charles K, Gray LJ, Camosso-Stepinovic J, Davies MJ, Khunti K. Effectiveness of interventions for reducing diabetes and cardiovascular disease risk in people with metabolic syndrome: Systematic review and mixed treatment comparison meta-analysis. *Diabetes, Obesity and Metabolism* 2012;14(7):616-25.
102. Fretheim A, Odgaard-Jensen J, Brors O, Madsen S, Njolstad I, Norheim OF, et al. Comparative effectiveness of antihypertensive medication for primary prevention of cardiovascular disease: Systematic review and multiple treatments meta-analysis. *BMC Medicine* 2012;10.
103. Gray LJ, Cooper N, Dunkley A, Warren FC, Ara R, Abrams K, et al. A systematic review and mixed treatment comparison of pharmacological interventions for the treatment of obesity. *Obes Rev* 2012;13(6):483-98.
104. Gurusamy KS, Pissanou T, Pikhart H, Vaughan J, Burroughs AK, Davidson BR. Methods to decrease blood loss and transfusion requirements for liver transplantation. *Cochrane Database Syst Rev* 2011(12):CD009052.
105. Littlewood KJ, Higashi K, Jansen JP, Capkun-Niggli G, Balp MM, Doering G, et al. A network meta-analysis of the efficacy of inhaled antibiotics for chronic Pseudomonas infections in cystic fibrosis. *Journal of Cystic Fibrosis* 2012.
106. Liu SC, Tu YK, Chien MN, Chien KL. Effect of antidiabetic agents added to metformin on glycaemic control, hypoglycaemia and weight change in patients with type 2 diabetes: A network meta-analysis. *Diabetes, Obesity and Metabolism* 2012.
107. Mhaskar R, Redzepovic J, Wheatley K, Clark Otavio Augusto C, Miladinovic B, Glasmacher A, et al. Bisphosphonates in multiple myeloma: a network meta-analysis. *Cochrane Database of Systematic Reviews*: John Wiley & Sons, Ltd, 2012.
108. Migliore A, Broccoli S, Bizzi E, Lagana B. Indirect comparison of the effects of anti-TNF biological agents in patients with Ankylosing Spondylitis by means of a mixed treatment comparison performed on efficacy data from published randomised, controlled trials. *Journal of Medical Economics* 2012;15(3):473-80.
109. Migliore A, Bizzi E, Broccoli S, Lagana B. Indirect comparison of etanercept, infliximab, and adalimumab for psoriatic arthritis: mixed treatment comparison using placebo as common comparator. *Clin Rheumatol* 2012;31(1):193-4.



110. Nuesch E, Hauser W, Bernardy K, Barth J, Juni P. Comparative efficacy of pharmacological and non-pharmacological interventions in fibromyalgia syndrome: Network meta-analysis. *Annals of the Rheumatic Diseases* 2012.
111. Palmerini T, Biondi-Zoccai G, Della Riva D, Stettler C, Sangiorgi D, D'Ascenzo F, et al. Stent thrombosis with drug-eluting and bare-metal stents: evidence from a comprehensive network meta-analysis. *Lancet* 2012;379(9824):1393-402.
112. Reich K, Burden AD, Eaton JN, Hawkins NS. Efficacy of biologics in the treatment of moderate to severe psoriasis: a network meta-analysis of randomized controlled trials. *Br J Dermatol* 2012;166(1):179-88.
113. Roskell NS, Zimovetz EA, Rycroft CE, Eckert BJ, Tyas DA. Annualized relapse rate of first-line treatments for multiple sclerosis: A meta-analysis, including indirect comparisons versus fingolimod. *Current Medical Research and Opinion* 2012;28(5):767-80.
114. Schmitz S, Adams R, Walsh CD, Barry M, FitzGerald O. A mixed treatment comparison of the efficacy of anti-TNF agents in rheumatoid arthritis for methotrexate non-responders demonstrates differences between treatments: a Bayesian approach. *Ann Rheum Dis* 2012;71(2):225-30.
115. Stam WB, Jansen JP, Taylor SD. Efficacy of etoricoxib, celecoxib, lumiracoxib, non-selective NSAIDs, and acetaminophen in osteoarthritis: A mixed treatment comparison. *Open Rheumatology Journal* 2012;6(1):6-20.
116. Tang DH, Malone DC. A network meta-analysis on the efficacy of serotonin type 3 receptor antagonists used in adults during the first 24 hours for postoperative nausea and vomiting prophylaxis. *Clin Ther* 2012;34(2):282-94.
117. Terasawa T, Trikalinos NA, Djulbegovic B, Trikalinos TA. Comparative efficacy of first-line therapies for advanced-stage chronic lymphocytic leukemia: A multiple-treatment meta-analysis. *Cancer Treatment Reviews* 2012.
118. Thakkinstian A, Attia J, Anothaisintawee T, Nickel JC. (alpha)-blockers, antibiotics and anti-inflammatories have a role in the management of chronic prostatitis/chronic pelvic pain syndrome. *BJU International* 2012.
119. Vejakama P, Thakkinstian A, Lertrattananon D, Ingsathit A, Ngarmukos C, Attia J. Reno-protective effects of renin-angiotensin system blockade in type 2 diabetic patients: a systematic review and network meta-analysis (Provisional abstract). *Diabetologia*, 2012:566-78.
120. Wolff RF, Aune D, Truyers C, Hernandez AV, Misso K, Riemsma R, et al. Systematic review of efficacy and safety of buprenorphine versus fentanyl or morphine in patients with chronic moderate to severe pain. *Current Medical Research and Opinion* 2012;28(5):833-45.
121. Zintzaras E, Doxani C, Mprotsis T, Schmid CH, Hadjigeorgiou GM. Network Analysis of Randomized Controlled Trials in Multiple Sclerosis. *Clinical Therapeutics* 2012;34(4):857-69.e9.
